# TABLE OF CONTENTS

# ANESTHESIOLOGY

Volume 137  
Issue 6  
December 2022

## This Month in ANESTHESIOLOGY .....A1

### Science, Medicine, and the Anesthesiologist.....A13

### Infographics in Anesthesiology .....A17

### Editorial

**Prediction Algorithms: Is Peer Review Enough?**  
*L. G. Glance, L. Vutskits, A. Davidson.....661*

**Collaborative Artificial Intelligence in Practice: The Next Steps**  
*J. M. Blum, D. M. Kuehn.....664*

### Special Article

**Thomas Dent Mütter, M.D. (1811 to 1859): Exemplar of Expertise**  
*A. J. Schwartz, M. L. Coleman, J. S. Moon.....666*

Thomas Mütter, M.D., a pioneering surgeon in Philadelphia, Pennsylvania, championed anesthesia, asepsis, and education as essential pillars of clinical medicine. He remains a model clinician educator in his extraordinary advocacy for safe and compassionate patient care.

### Perioperative Medicine

#### CLINICAL SCIENCE

◆◇◆ Risk Stratification Index 3.0, a Broad Set of Models for Predicting Adverse Events during and after Hospital Admission  
*S. Greenwald, G. F. Chamoun, N. G. Chamoun, D. Clain, Z. Hong, R. Jordan, P. J. Manberg, K. Maheshwari, D. I. Sessler.....673*

From a dataset of more than 9 million patients, a risk score based on administrative claims history was developed to provide individualized risk profiles at hospital admission that may help guide patient management. SUPPLEMENTAL DIGITAL CONTENT IS AVAILABLE IN THE TEXT

### BASIC SCIENCE

◆◇ Local Anesthetic Cardiac Toxicity Is Mediated by Cardiomyocyte Calcium Dynamics  
*J. Plakhotnik, L. Zhang, M. Estrada, J. G. Coles, P.-A. Lonnqvist, J. T. Maynes.....687*

This study used human induced pluripotent stem cell–derived cardiomyocytes and found significantly altered cardiomyocyte calcium dynamics with bupivacaine but not ropivacaine. Calcium supplementation restored normal cardiomyocyte rhythm to bupivacaine-treated tissue. Calcium channel blockade selectively worsened bupivacaine cardiotoxicity. This study used a rat model (female) of cardiac toxicity and found that pretreatment with calcium improved survival of bupivacaine-treated rats and reduced survival of ropivacaine-treated rats. SUPPLEMENTAL DIGITAL CONTENT IS AVAILABLE IN THE TEXT

### Critical Care Medicine

#### CLINICAL SCIENCE

◆◇◆ Validation of a Deep Learning–based Automatic Detection Algorithm for Measurement of Endotracheal Tube–to–Carina Distance on Chest Radiographs  
*M.-H. Huang, C.-Y. Chen, M.-H. Horng, C.-I. Li, I.-L. Hsu, C.-M. Su, Y.-N. Sun, C.-H. Lai .....704*

A deep learning–based algorithm developed using portable chest radiographs from 1,842 adult intubated patients can identify the endotracheal tube tip, carina, and endotracheal tube tip–to–carina distance with a measurement error of 2.6 mm, 3.6 mm, and 4.0 mm, respectively. The algorithm performed as well as, if not better than, 11 critical care clinicians in identifying these portable chest radiograph landmarks. SUPPLEMENTAL DIGITAL CONTENT IS AVAILABLE IN THE TEXT

◆◇ Refers to This Month in ANESTHESIOLOGY

◆◇ Refers to Editorial

◆◇ This article has an Audio Podcast

◆◇ See Supplemental Digital Content

◆◇ CME Article

◆◇ This article has a Video Abstract

◆◇ Readers' Toolbox

◆◇ This article has a Visual Abstract

◆◇ This article is Open Access

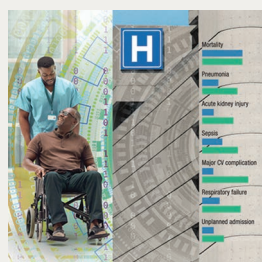

**ON THE COVER:** Risk stratification helps guide appropriate clinical care. In this issue of ANESTHESIOLOGY, Greenwald *et al.* developed and validated a broad suite of predictive tools based on administrative claims history to provide individualized risk profiles at hospital admission. In an accompanying editorial, Glance *et al.* discuss the role of prediction models in healthcare and how journals can disseminate valid prediction models to clinicians. Cover illustration: A. Johnson, Vivo Visuals Studio.

- Greenwald *et al.*: Risk Stratification Index 3.0, a Broad Set of Models for Predicting Adverse Events during and after Hospital Admission, p. 673
- Glance *et al.*: Prediction Algorithms: Is Peer Review Enough?, p. 661

## BASIC SCIENCE

   **Post-cardiac arrest Sedation Promotes Electroencephalographic Slow-wave Activity and Improves Survival in a Mouse Model of Cardiac Arrest**

*T. Ikeda, E. Amorim, Y. Miyazaki, R. Kato, E. Marutani, M. G. Silverman, R. Malhotra, K. Solt, F. Ichinose* .....716

Sedation with propofol or dexmedetomidine, started at the time of return of spontaneous circulation, results in better survival and neurologic outcomes than no sedation in an animal model of cardiac arrest. Sedation was associated with increased slow-wave electroencephalogram power and normalization of electroencephalogram patterns, which were positively correlated with neurologic outcome. These beneficial effects are not seen if the sedation is commenced an hour after recovery of spontaneous circulation.  
 SUPPLEMENTAL DIGITAL CONTENT IS AVAILABLE IN THE TEXT

## Education

### IMAGES IN ANESTHESIOLOGY

 **Radiographic Demonstration of Hypoxic Pulmonary Vasoconstriction during One-lung Ventilation**

*R. L. Royster, S. D. Johnson, N. D. Krupp, T. P. Sullivan* .....733

SUPPLEMENTAL DIGITAL CONTENT IS AVAILABLE IN THE TEXT

### CLINICAL FOCUS REVIEW

 **Review of Postoperative Respiratory Depression: From Recovery Room to General Care Unit**

*T. N. Weingarten, J. Sprung* .....735

Contemporary evidence suggests that episodes of respiratory depression during anesthesia recovery are associated with subsequent respiratory complications in general care units.

## MIND TO MIND

**Three Lives Changed Forever...**

*C. Johnson* .....742

## CORRESPONDENCE

**Influenza Vaccination in Perioperative Settings: A Teachable Moment**

*S. Rao, T. Morrissey, S. I. Ziniel, T. Mandler, M. Yaster, K. M. Strupp* .....745

**Ketamine Pharmacodynamics Entangled: Comment**

*T. A. Bowdle, N. Sackett, R. Strassman, T. F. Murray, S. Jelacic, C. Chavkin* .....747

**Ketamine Pharmacodynamics Entangled: Reply**

*A. Dahan, E. Olofsen, T. K. Henthorn, M. van Velzen, M. Niesters*.....748

**Implementation of a More Sustainable Waste Management Policy in the Operating Room**

*C. Martin, F. Labaste, A. Assad, V. Minville, F. Vardon-Bounes*.....749

**Reviews of Educational Material ..... 752**

**Anesthesiology Reflections from the Wood Library-Museum**

**A Prelude to Painless Surgery: Charles F. Heywood's Invitation to W. T. G. Morton**

*R. P. Haridas and M. L. Coleman* ..... 703

**Paul Bert's OR on Wheels: A Hyperbaric Nitrous Oxide Chamber**

*J. S. Moon*..... 732

**Careers & Events .....A19**

## INSTRUCTIONS FOR AUTHORS

The most recently updated version of the Instructions for Authors is available at [www.anesthesiology.org](http://www.anesthesiology.org). Please refer to the Instructions for the preparation of any material for submission to ANESTHESIOLOGY.

Manuscripts submitted for consideration for publication must be submitted in electronic format via Editorial Manager (<https://www.editorialmanager.com/aln>). Detailed directions for submission and the most recent version of the Instructions for Authors can be found on the Journal's Web site (<http://www.anesthesiology.org>). Books and educational materials for review should be sent to Alan Jay Schwartz, M.D., M.S.Ed., Director of Education, Department of Anesthesiology and Critical Care Medicine, The Children's Hospital of Philadelphia,

34th Street and Civic Center Blvd., Room 9327, Philadelphia, Pennsylvania 19104-4399. Article-specific permission requests are managed with Copyright Clearance Center's Rightslink service. Information can be accessed directly from articles on the journal Web site. More information is available at <http://anesthesiology.pubs.asahq.org/public/rightsandpermissions.aspx>. For questions about the Rightslink service, e-mail [customer-care@copyright.com](mailto:customer-care@copyright.com) or call 877-622-5543 (U.S. only) or 978-777-9929. Advertising and related correspondence should be addressed to Advertising Manager, ANESTHESIOLOGY, Wolters Kluwer Health, Inc., Two Commerce Square, 2001 Market Street, Philadelphia, Pennsylvania 19103 (Web site: <http://www.wkad-center.com/>). Publication of an advertisement in an ASA publication or on an ASA website does not constitute endorsement or evaluation by ASA or by ASA's publishing partners of the product or service described therein or of any representations or claims made by the advertiser with respect to the product or service.

**ANESTHESIOLOGY** (ISSN 0003-3022) is published monthly by Wolters Kluwer Health, Inc., 1800 Dual Highway, Suite 201, Hagerstown, MD 21740-6636. Business office: Two Commerce Square, 2001 Market Street, Philadelphia, PA 19103. Periodicals postage paid at Hagerstown, MD, and at additional mailing offices. Copyright © 2022, the American Society of Anesthesiologists. All Rights Reserved.

**Annual Subscription Rates:** *United States*—\$1125 Individual, \$2904 Institution, \$442 In-training. *Rest of World*—\$1186 Individual, \$3224 Institution, \$442 In-training. Single copy rate \$288. Subscriptions outside of North America must add \$58 for airfreight delivery. Add state sales tax, where applicable. The GST tax of 7% must be added to all orders shipped to Canada (Wolters Kluwer Health, Inc.'s GST Identification #895524239, Publications Mail Agreement #1119672). Indicate in-training status and name of institution. Institution rates apply to libraries, hospitals, corporations, and partnerships of three or more individuals. Subscription prices outside the United States must be prepaid. Prices subject to change without notice. Subscriptions will begin with currently available issue unless otherwise requested. Visit us online at [www.lww.com](http://www.lww.com).

Individual and in-training subscription rates include print and access to the online version. Online-only subscriptions for individuals (\$372) and persons in training (\$372) are available to nonmembers and may be ordered by downloading a copy of the Online Subscription FAXback Form from the Web site, completing the information requested, and faxing the completed form to 301-223-2400. Institutional rates are for print only; online subscriptions are available via Ovid. Institutions can choose to purchase a print and online subscription together for a discounted rate. Institutions that wish to purchase a print subscription, please contact Wolters Kluwer Health,

Inc., 1800 Dual Highway, Suite 201, Hagerstown, MD 21740-6636; phone: 800-638-3030; fax: 301-223-2400. Institutions that wish to purchase an online subscription or online with print, please contact the Ovid Regional Sales Office near you or visit [www.ovid.com/site/index.jsp](http://www.ovid.com/site/index.jsp) and select Contact and Locations.

**Address for non-member subscription information, orders, or change of address:** Wolters Kluwer Health, Inc., 1800 Dual Highway, Suite 201, Hagerstown, MD 21740-6636; phone: 800-638-3030; fax: 301-223-2400.

**Address for member subscription information, orders, or change of address:** Members of the American Society of Anesthesiologists receive the print and online journal with their membership. To become a member or provide a change of address, please contact the American Society of Anesthesiologists, 1061 American Lane, Schaumburg, Illinois 60173-4973; phone: 847-825-5586; fax: 847-825-1692; e-mail: [membership@ASAhq.org](mailto:membership@ASAhq.org). For all other membership inquiries, contact Wolters Kluwer Health, Inc., Customer Service Department, P.O. Box 1610, Hagerstown, MD 21740; phone: 800-638-3030; fax: 301-223-2400.

**Postmaster:** Send address changes to ANESTHESIOLOGY, P.O. BOX 1610, Hagerstown, MD 21740.

**Advertising:** Please contact Kelle Gray, National Account Manager, Health Learning, Research & Practice, Medical Journals, Wolters Kluwer Health, Inc.; phone: 843-261-4221; e-mail: [Kelle.Gray@wolterskluwer.com](mailto:Kelle.Gray@wolterskluwer.com). For classified advertising: Dave Wiegand, Recruitment Advertising Representative, Wolters Kluwer Health, Inc.; phone: 847-361-6128; e-mail: [Dave.Wiegand@wolterskluwer.com](mailto:Dave.Wiegand@wolterskluwer.com).
